# Supplementary material for: Composted Bagasse and/or Cyanobacteria-Based Bio-Stimulants Maintain Barley Growth and Productivity under Salinity Stress
Source: MDPI journal article supplement (doi:10.3390/plants12091827), 2023-04-29
Supplement: s1 [file s1]

Table S1. Meteorological data of the experimental sites during 2020/2021 and 2021/2022 growing seasons.

| Year<br>Month | 2020/2021        |      |                  |                          | 2021/2022        |      |                  |                          |
|---------------|------------------|------|------------------|--------------------------|------------------|------|------------------|--------------------------|
|               | Temperature (°C) |      | Rainfall<br>(mm) | Relative<br>humidity (%) | Temperature (°C) |      | Rainfall<br>(mm) | Relative<br>humidity (%) |
|               | max              | min  |                  |                          | max              | min  |                  |                          |
| December      | 25.8             | 17.4 | 0.68             | 36.3                     | 24.4             | 17.5 | 0.74             | 35.6                     |
| January       | 24.9             | 15.9 | 1.48             | 34.4                     | 23.5             | 15.8 | 0.99             | 33.9                     |
| February      | 23.4             | 14.7 | 3.68             | 33.6                     | 22.6             | 13.9 | 3.51             | 37.8                     |
| March         | 22.8             | 11.6 | 6.58             | 44.5                     | 21.7             | 10.6 | 6.68             | 46.5                     |
| April         | 24.4             | 11.9 | 0.42             | 47.5                     | 23.8             | 10.3 | 0.47             | 47.2                     |

**Table S2.** Physical and chemical properties of the experimental soil (0–30 cm depth) in 2020/2021 and 2021/2022.

| Character                                                      | 2020/21                  | 2021/22      |
|----------------------------------------------------------------|--------------------------|--------------|
| pH (1:2.5 soil:water suspension)                               | 8.11 ± 0.01 <sup>†</sup> | 8.12 ± 0.01  |
| Electrical conductivity (EC, dS m <sup>-1</sup> ) <sup>‡</sup> | 5.14 ± 0.01              | 5.25 ± 0.01  |
| Soil organic matter (g kg <sup>-1</sup> )                      | 11.22 ± 0.01             | 11.35 ± 0.02 |
| ESP # (%)                                                      | 22.01 ± 0.14             | 21.08 ± 0.11 |
| Soluble cations (meq L <sup>-1</sup> ) <sup>‡</sup>            |                          |              |
| Ca <sup>++</sup>                                               | 7.25 ± 0.44              | 8.01 ± 0.26  |
| Mg <sup>++</sup>                                               | 5.14 ± 1.22              | 6.09 ± 1.19  |
| Na <sup>+</sup>                                                | 26.65 ± 2.01             | 24.25 ± 3.01 |
| K <sup>+</sup>                                                 | 0.67 ± 0.08              | 0.55 ± 0.09  |
| Soluble anions (meq L <sup>-1</sup> ) <sup>‡</sup>             |                          |              |
| CO <sub>3</sub> <sup>--</sup>                                  | nd <sup>‡</sup>          | nd           |
| HCO <sub>3</sub> <sup>-</sup>                                  | 4.33 ± 0.23              | 3.98 ± 0.15  |
| Cl <sup>-</sup>                                                | 24.44 ± 1.01             | 22.65 ± 1.35 |
| SO <sub>4</sub> <sup>--</sup>                                  | 15.54 ± 3.32             | 14.36 ± 3.55 |
| Available macronutrients (mg kg <sup>-1</sup> )                |                          |              |
| N                                                              | 9.78 ± 0.24              | 9.12 ± 0.18  |
| P                                                              | 8.98 ± 1.36              | 8.87 ± 1.45  |
| K                                                              | 325 ± 20.03              | 335 ± 24.28  |

<sup>†</sup> Standard deviation; <sup>‡</sup> not detected; <sup>‡</sup> measured in soil paste extract; # exchangeable sodium percentage.

**Table S3.** Characterization of irrigation water during the 2020/2021 and 2021/2022 seasons.

| Character                                          | Fresh Water  |              | Saline Water *  |              |
|----------------------------------------------------|--------------|--------------|-----------------|--------------|
|                                                    | 2020/21      | 2021/22      | 2020/21         | 2021/22      |
| pH                                                 | 7.65 ± 0.44  | 7.48 ± 0.52  | 8.21 ± 0.09     | 8.02 ± 0.08  |
| EC (dS m <sup>-1</sup> )                           | 0.68 ± 0.11  | 0.77 ± 0.01  | 3.97 ± 0.04     | 3.98 ± 0.05  |
| SAR                                                | 1.48 ± 0.11  | 1.48 ± 0.06  | 7.69 ± 0.47     | 7.88 ± 0.35  |
| Na <sup>+</sup> (mq L <sup>-1</sup> )              | 1.65 ± 0.12  | 1.74 ± 0.04  | 15.36 ± 1.21    | 16.03 ± 1.19 |
| Cl <sup>-</sup> (mq L <sup>-1</sup> )              | 3.52 ± 0.01  | 3.63 ± 0.05  | 12.22 ± 0.58    | 11.89 ± 0.41 |
| SO <sub>4</sub> <sup>-</sup> (mq L <sup>-1</sup> ) | 0.19 ± 0.02  | 0.18 ± 0.02  | 7.57 ± 0.17     | 8.10 ± 0.05  |
| NH <sub>4</sub> <sup>+</sup> (mq L <sup>-1</sup> ) | 1.49 ± 0.03  | 1.32 ± 0.04  | 2.35 ± 0.02     | 2.21 ± 0.03  |
| COD (mq L <sup>-1</sup> )                          | 12.39 ± 0.77 | 11.91 ± 0.96 | nd <sup>‡</sup> | nd           |
| BOD (mq L <sup>-1</sup> )                          | 5.28 ± 0.38  | 5.33 ± 0.37  | nd              | nd           |
| SS (mq L <sup>-1</sup> )                           | 184 ± 12.59  | 180 ± 12.4   | 16 ± 1.2        | 15 ± 1.2     |
| DS (mq L <sup>-1</sup> )                           | 378 ± 44     | 387 ± 45     | 2854 ± 148      | 2789 ± 145   |

COD: chemical oxygen demand; BOD: biological oxygen demand; SS: suspended solids; DS: dissolved solids. \* Well water at a depth of 20 m; <sup>‡</sup> not detected.
